# Supplementary material for: Biophysical insights into the membrane interaction of the core amyloid-forming Aβ40fragment K16–K28 and its role in the pathogenesis of Alzheimer's disease
Source: Royal Society of Chemistry journal article supplement (doi:10.1039/c6cp02023b), 2016-01-01
Supplement: c6cp02023b1.pdf [file c6cp02023b1.pdf]

## Supporting Information

### **Biophysical Insights into the Membrane Interaction of the Core Amyloid-Forming A $\beta$ <sub>40</sub> fragment K16-K28 and its Role in the Pathogenesis of Alzheimer's Disease**

Swapna Bera<sup>1,‡</sup>, Kyle J. Korshavn<sup>2,‡</sup>, Rajiv K. Kar<sup>1</sup>, Mi Hee Lim<sup>3</sup>, Ayyalusamy Ramamoorthy<sup>2,4</sup>, Anirban Bhunia<sup>1,\*</sup>

<sup>1</sup>Department of Biophysics, Bose Institute, Kolkata 700 054, India.

<sup>2</sup>Department of Chemistry, University of Michigan, Ann Arbor, MI 48109, USA.

<sup>3</sup>Department of Chemistry, Ulsan National Institute of Science and Technology (UNIST), Ulsan, 44919, Republic of Korea.

<sup>4</sup>Biophysics Program, University of Michigan, Ann Arbor, MI 48109, USA.

<sup>‡</sup>These authors contributed equally to this work

\*Corresponding Author:

Anirban Bhunia ([bhunias@jbose.ac.in](mailto:bhunias@jbose.ac.in) or [anirbanbhunia@gmail.com](mailto:anirbanbhunia@gmail.com))

## Methods of calculating $-S_{CD}$ and area per lipid

Calculation of lipid order parameters  $-S_{CD}$  and area per lipid was performed using MEMBPLUGIN module [1]. For the calculation of these parameters, the Desmond trajectories were made converted to Gromacs format using VMD software. Importantly, the system was oriented to make the bilayer normal along the Z-axis and the periodic boundary conditions were removed. The parameter files were introduced by saving the atom name in the pdb format that were finally used for recognition of the system for the calculation. Step size was fixed to 50 frames interval for the calculation.

**Table S1:** Details of the systems used in MD simulations.

| Membrane constitutes                                            | Purpose                       | Time Scale | Number of trajectories | Number of atoms |
|-----------------------------------------------------------------|-------------------------------|------------|------------------------|-----------------|
| POPC                                                            | Production run                | 150 ns     | 2                      | 13,163          |
| DMPC                                                            | Production run                | 150 ns     | 2                      | 11,014          |
| GM1 <sup>*</sup>                                                | Equilibrium run <sup>**</sup> | 10 ns      | 1                      | 41,108          |
| GM1                                                             | Equilibrium run <sup>**</sup> | 10 ns      | 1                      | 41,388          |
| GM1                                                             | Production run                | 200 ns     | 1                      | 21,027          |
| POPC:POPG:cholesterol:GM1                                       | Equilibrium run <sup>**</sup> | 10 ns      | 1                      | 58,591          |
| POPC:POPG:cholesterol:GM1                                       | Production run                | 50 ns      | 2                      | 59,667          |
| POPC:POPG:cholesterol:GM1 <sup>*</sup><br>(system without KK13) | Production run                | 50 ns      | 1                      | 54,168          |

<sup>\*</sup>MD simulations were processed without the presence of KK13 peptide.

<sup>\*\*</sup>Equilibrium run was always followed with the removal of water molecules and setting of the system again for the purpose of production run.

**Table S2:** Comparison of area per lipid molecule in the presence of peptide.

| Area per lipid molecules ( $\text{\AA}^2$ ) | Present study     | Collected from Experimental or Theoretical studies |                       |                       |                       |
|---------------------------------------------|-------------------|----------------------------------------------------|-----------------------|-----------------------|-----------------------|
| POPC                                        | 72.4 <sup>#</sup> | 65.2 <sup>+</sup> [2]                              | 64.3 <sup>*</sup> [3] | 68.3 <sup>*</sup> [4] | 68.4 <sup>*</sup> [5] |
| DMPC                                        | 67.0 <sup>#</sup> | 59.9 <sup>*</sup> [3]                              | 60.6 <sup>*</sup> [4] | 60.8 <sup>*</sup> [6] | 60.0 <sup>+</sup> [7] |

<sup>#</sup> Computed based on average of two trajectories over last 50 ns time frame.

<sup>+</sup> Data collected from reported MD simulation studies.

<sup>\*</sup> Experimental results for POPC and DMPC bilayer at 30° C.

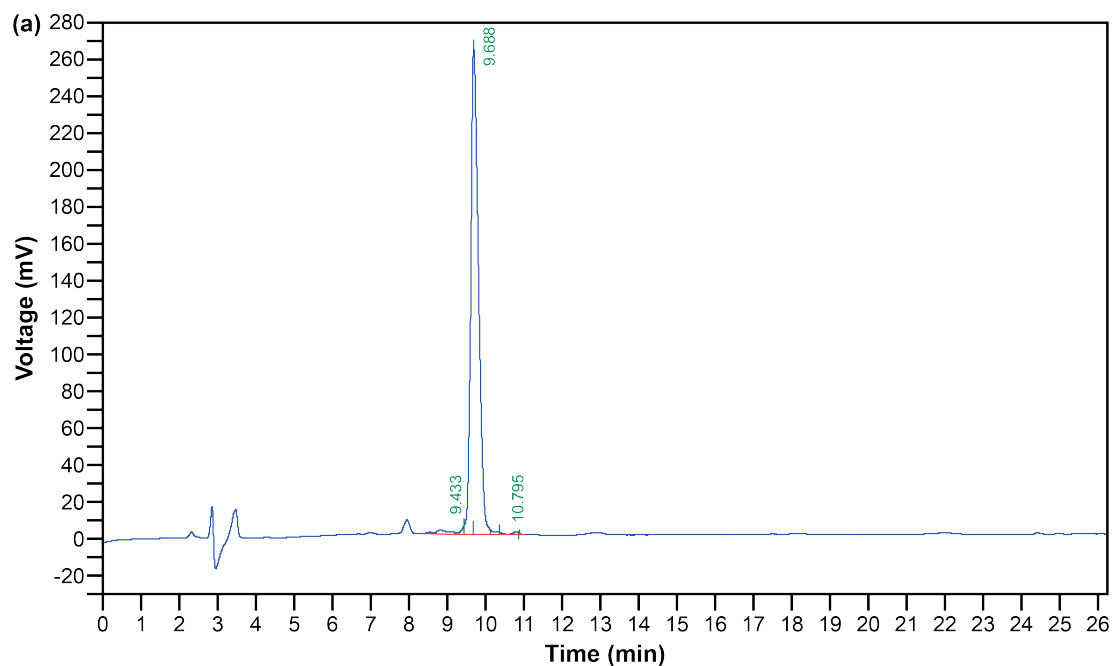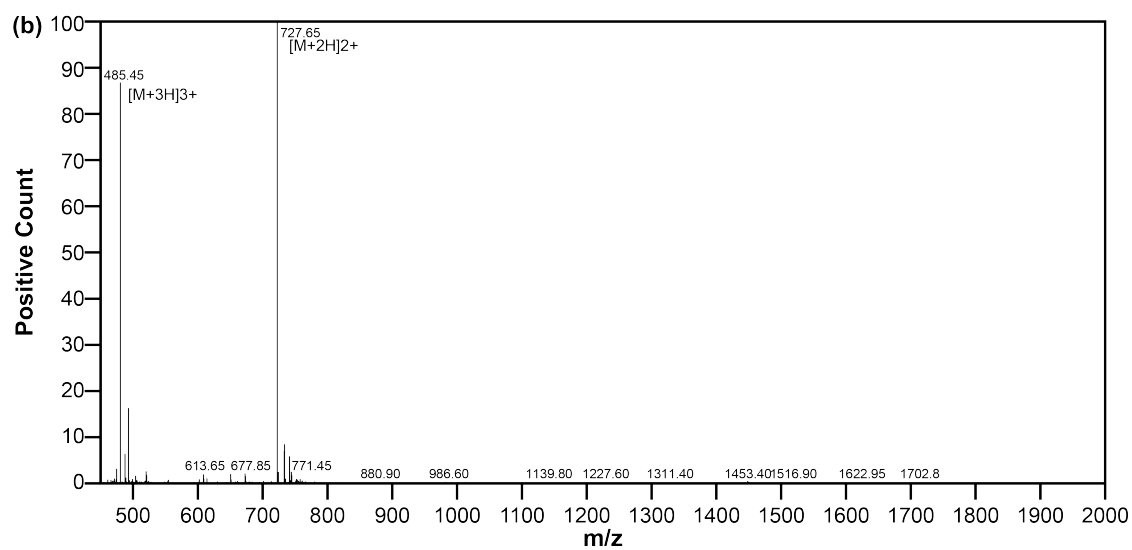

**Supporting Figure S1.** The HPLC trace (a) and mass spectrum (b) of KK13, obtained from the vendor, GL Biochem (Sanghai, China). The peptide was received at >95% purity and used without further purification.

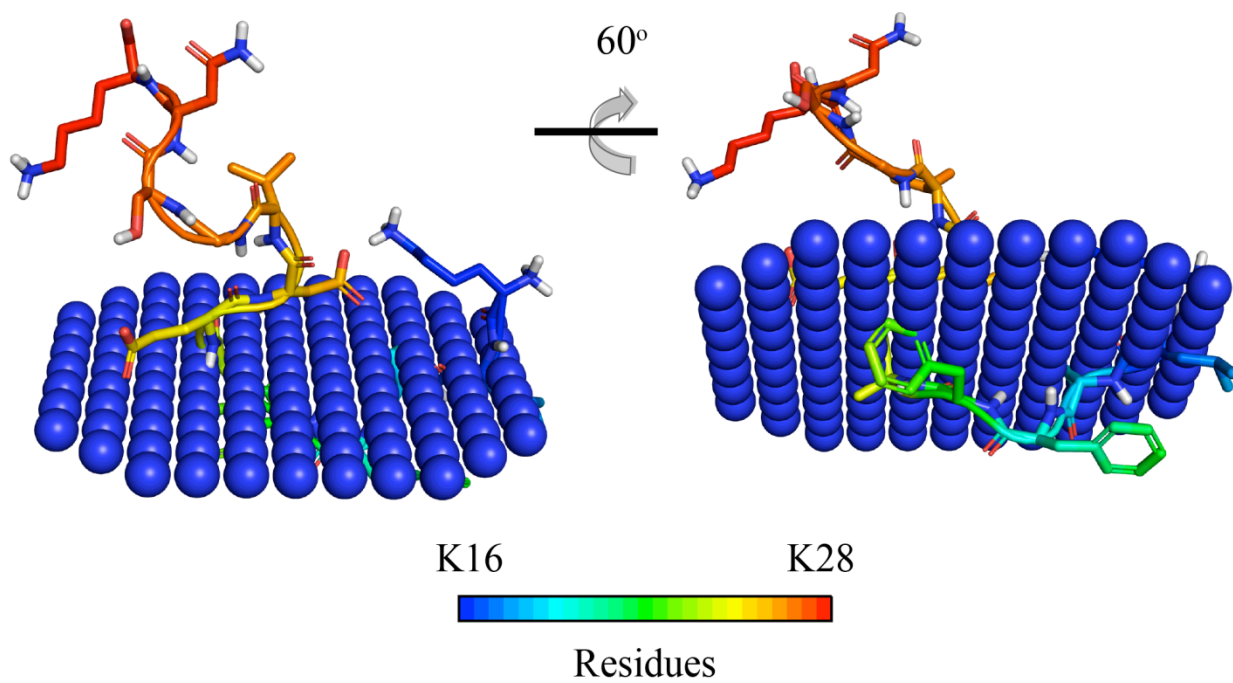

**Supporting Figure S2.** Alignment of peptide relative to lipid bilayer surface as modelled by the OPM server (<http://www.opm.phar.umich.edu>).

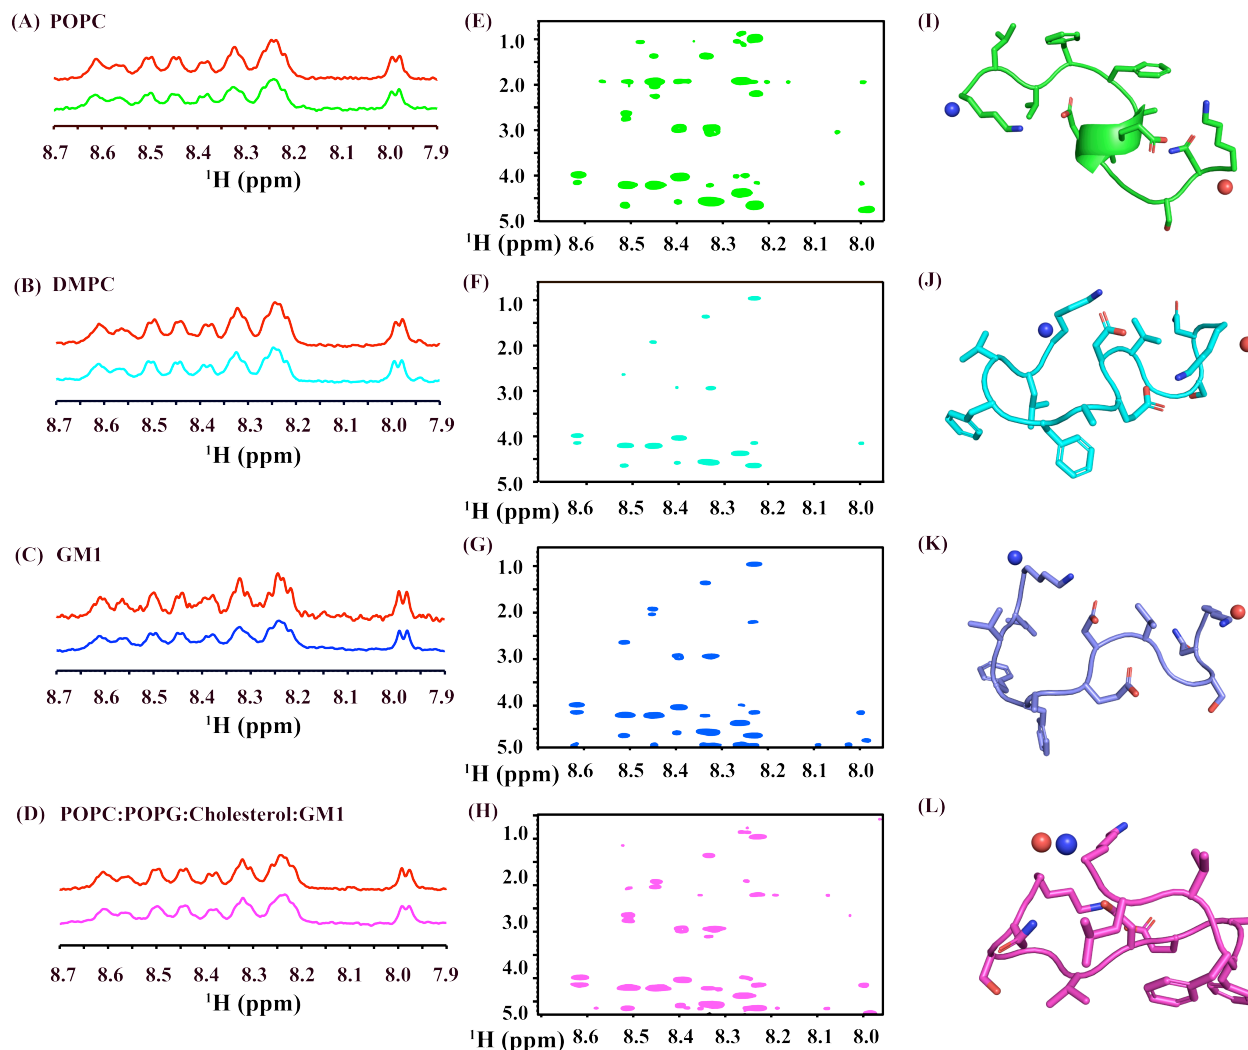

**Supporting Figure S3:** Proton detected NMR spectra of KK13 in the presence of lipids. (A-D) Amide regions of 1D  $^1\text{H}$  spectra of KK13 in the absence (red) and the presence (color) of lipid. (E-H) The  $\text{H}^\alpha\text{-NH}$  and side chain-NH region of *tr*-NOESY spectra of KK13 in the presence of indicated LUVs. NMR experiments were carried out with 0.5mM peptide in a buffer solution composed of 20mM  $\text{PO}_4$ , 50mM NaCl (pH 7.4) on a 500 MHz Bruker Avance III spectrometer at 283 K. Structural snapshots of KK13 collected from MD simulation (I-L).

#### References:

- [1] R. Guixa-Gonzalez, I. Rodriguez-Espigares, J. M. Ramirez-Angueta, P. Carrio-Gaspar, H. Martinez-Seara and T. Giorgino, J. Selent, *Bioinformatics Advance*, 2014, 30(10), 1478-80.
- [2] A.A.. Gurtovenko and I. Vattulainen, *J. Phys. Chem. B.*, 2008, 112(7), 1953-62.

- [3] N. Kucerka, M.P. Nieh, J. Katsars, *Biochim. Biophys. Acta*, 2011, 1808(11), 2761-71.
- [4] N. Kucerka, S., Tristram-Nagle, J.F. Nagle, *J. Membr. Biol.*, 2005, 208(3), 193-202.
- [5] D.E. Elmore, *FEBS Lett.*, 2006, 580(1), 144-148.
- [6] N. Kucerka, Y. Liu, N. Chu, H.I. Petrache, S. Tristram-Nagle, J.F. Nagle, *Biophys J.*, 2005, 88(4), 2626-2637.
- [7] T. Broemstrup, N. Reuter, *Biophys J.*, 2010, 99(3), 825-833.
